# Supplementary material
Source: publisher figshare collection journal article supplement (https://acs.figshare.com/ndownloader/files/4274236)
Supplement: Supplementary file 1 [file 4274236]

 
data_a 
 
_audit_creation_method            SHELXL-97 
_chemical_name_systematic 
; 
 ? 
; 
_chemical_name_common             ? 
_chemical_melting_point           ? 
_chemical_formula_moiety          ? 
_chemical_formula_sum 
 'C50 H54 Cd6 N16 O31 S2' 
_chemical_formula_weight          2113.61 
 
loop_ 
 _atom_type_symbol 
 _atom_type_description 
 _atom_type_scat_dispersion_real 
 _atom_type_scat_dispersion_imag 
 _atom_type_scat_source 
 'C'  'C'   0.0033   0.0016 
 'International Tables Vol C Tables 4.2.6.8 and 6.1.1.4' 
 'H'  'H'   0.0000   0.0000 
 'International Tables Vol C Tables 4.2.6.8 and 6.1.1.4' 
 'N'  'N'   0.0061   0.0033 
 'International Tables Vol C Tables 4.2.6.8 and 6.1.1.4' 
 'O'  'O'   0.0106   0.0060 
 'International Tables Vol C Tables 4.2.6.8 and 6.1.1.4' 
 'S'  'S'   0.1246   0.1234 
 'International Tables Vol C Tables 4.2.6.8 and 6.1.1.4' 
 'Cd'  'Cd'  -0.8075   1.2024 
 'International Tables Vol C Tables 4.2.6.8 and 6.1.1.4' 
 
_symmetry_cell_setting            orthorhombic
_symmetry_space_group_name_H-M    Fdd2
 
loop_ 
 _symmetry_equiv_pos_as_xyz 
 'x, y, z' 
 '-x, -y, z' 
 'x+1/4, -y+1/4, z+1/4' 
 '-x+1/4, y+1/4, z+1/4' 
 'x, y+1/2, z+1/2' 
 '-x, -y+1/2, z+1/2' 
 'x+1/4, -y+3/4, z+3/4' 
 '-x+1/4, y+3/4, z+3/4' 
 'x+1/2, y, z+1/2' 
 '-x+1/2, -y, z+1/2' 
 'x+3/4, -y+1/4, z+3/4' 
 '-x+3/4, y+1/4, z+3/4' 
 'x+1/2, y+1/2, z' 
 '-x+1/2, -y+1/2, z' 
 'x+3/4, -y+3/4, z+1/4' 
 '-x+3/4, y+3/4, z+1/4' 
 
_cell_length_a                    36.285(15) 
_cell_length_b                    37.132(14) 
_cell_length_c                    9.665(4) 
_cell_angle_alpha                 90.00 
_cell_angle_beta                  90.00 
_cell_angle_gamma                 90.00 
_cell_volume                      13022(9) 
_cell_formula_units_Z             8 
_cell_measurement_temperature     293(2) 
_cell_measurement_reflns_used     3754
_cell_measurement_theta_min       2.1938 
_cell_measurement_theta_max       27.4719
 
_exptl_crystal_description        needlelike 
_exptl_crystal_colour             Yellowish 
_exptl_crystal_size_max           0.2400
_exptl_crystal_size_mid           0.0200
_exptl_crystal_size_min           0.0200
_exptl_crystal_density_meas       ? 
_exptl_crystal_density_diffrn     2.156 
_exptl_crystal_density_method     'not measured' 
_exptl_crystal_F_000              8272 
_exptl_absorpt_coefficient_mu     2.093 
_exptl_absorpt_correction_type    Multi-scan
_exptl_absorpt_correction_T_min   0.6441
_exptl_absorpt_correction_T_max   1.0000
_exptl_absorpt_process_details    ? 
 
_exptl_special_details 
; 
 ? 
; 
 
_diffrn_ambient_temperature       293(2) 
_diffrn_radiation_wavelength      0.71073 
_diffrn_radiation_type            MoK\a 
_diffrn_radiation_source          'fine-focus sealed tube' 
_diffrn_radiation_monochromator   graphite 
_diffrn_measurement_device_type   ? 
_diffrn_measurement_method        ? 
_diffrn_detector_area_resol_mean  ? 
_diffrn_standards_number          ? 
_diffrn_standards_interval_count  ? 
_diffrn_standards_interval_time   ? 
_diffrn_standards_decay_%         ? 
_diffrn_reflns_number             25220 
_diffrn_reflns_av_R_equivalents   0.0536 
_diffrn_reflns_av_sigmaI/netI     0.0590 
_diffrn_reflns_limit_h_min        -41 
_diffrn_reflns_limit_h_max        46 
_diffrn_reflns_limit_k_min        -48 
_diffrn_reflns_limit_k_max        46 
_diffrn_reflns_limit_l_min        -12 
_diffrn_reflns_limit_l_max        12 
_diffrn_reflns_theta_min          2.25 
_diffrn_reflns_theta_max          27.47 
_reflns_number_total              7379 
_reflns_number_gt                 6756 
_reflns_threshold_expression      >2sigma(I) 
 
_computing_data_collection        'CrystalClear (Rigaku Inc., 2007)'
_computing_cell_refinement        'CrystalClear (Rigaku Inc., 2007)'
_computing_data_reduction         'CrystalClear (Rigaku Inc., 2007)'
_computing_structure_solution     'SHELXS-97 (Sheldrick, 1990)' 
_computing_structure_refinement   'SHELXL-97 (Sheldrick, 1997)' 
_computing_molecular_graphics     ? 
_computing_publication_material   ? 
 
_refine_special_details 
; 
 Refinement of F^2^ against ALL reflections.  The weighted R-factor wR and 
 goodness of fit S are based on F^2^, conventional R-factors R are based 
 on F, with F set to zero for negative F^2^. The threshold expression of 
 F^2^ > 2sigma(F^2^) is used only for calculating R-factors(gt) etc. and is 
 not relevant to the choice of reflections for refinement.  R-factors based 
 on F^2^ are statistically about twice as large as those based on F, and R- 
 factors based on ALL data will be even larger. 
; 
 
_refine_ls_structure_factor_coef  Fsqd  
_refine_ls_matrix_type            full 
_refine_ls_weighting_scheme       calc  
_refine_ls_weighting_details 
 'calc w=1/[\s^2^(Fo^2^)+(0.0398P)^2^+15.3194P] where P=(Fo^2^+2Fc^2^)/3' 
_atom_sites_solution_primary      direct 
_atom_sites_solution_secondary    difmap 
_atom_sites_solution_hydrogens    geom 
_refine_ls_hydrogen_treatment     constr
_refine_ls_extinction_method      none 
_refine_ls_extinction_coef        ? 
_refine_ls_abs_structure_details 
 'Flack H D (1983), Acta Cryst. A39, 876-881' 
_refine_ls_abs_structure_Flack    0.02(3) 
_refine_ls_number_reflns          7379 
_refine_ls_number_parameters      474 
_refine_ls_number_restraints      1 
_refine_ls_R_factor_all           0.0490 
_refine_ls_R_factor_gt            0.0425 
_refine_ls_wR_factor_ref          0.0980 
_refine_ls_wR_factor_gt           0.0934 
_refine_ls_goodness_of_fit_ref    1.112 
_refine_ls_restrained_S_all       1.112 
_refine_ls_shift/su_max           0.007 
_refine_ls_shift/su_mean          0.001 
 
loop_ 
 _atom_site_label 
 _atom_site_type_symbol 
 _atom_site_fract_x 
 _atom_site_fract_y 
 _atom_site_fract_z 
 _atom_site_U_iso_or_equiv 
 _atom_site_adp_type 
 _atom_site_occupancy 
 _atom_site_symmetry_multiplicity 
 _atom_site_calc_flag 
 _atom_site_refinement_flags 
 _atom_site_disorder_assembly 
 _atom_site_disorder_group 
S1 S 0.27834(7) 0.31252(5) 0.8142(2) 0.0496(5) Uani 1 1 d . . . 
Cd1 Cd 0.048555(12) 0.253310(12) 0.07520(5) 0.02369(10) Uani 1 1 d . . . 
Cd2 Cd 0.166064(13) 0.387306(13) 0.38253(4) 0.02606(11) Uani 1 1 d . . . 
Cd3 Cd 0.162553(15) 0.272617(13) 0.27926(5) 0.03218(13) Uani 1 1 d . . . 
C1 C 0.12315(19) 0.33512(16) -0.1835(7) 0.0268(13) Uani 1 1 d . . . 
C2 C 0.07373(17) 0.32792(15) -0.3216(6) 0.0211(12) Uani 1 1 d . . . 
C3 C 0.09473(17) 0.28184(16) -0.1992(6) 0.0225(12) Uani 1 1 d . . . 
C4 C 0.1533(2) 0.39344(17) -0.1685(7) 0.0351(16) Uani 1 1 d . . . 
H4A H 0.1720 0.4047 -0.1114 0.042 Uiso 1 1 calc R . . 
H4B H 0.1301 0.4055 -0.1493 0.042 Uiso 1 1 calc R . . 
C5 C 0.1632(2) 0.3997(2) -0.3200(8) 0.0386(18) Uani 1 1 d . . . 
C6 C 0.17582(19) 0.34148(18) -0.0273(7) 0.0292(14) Uani 1 1 d . . . 
H6A H 0.2006 0.3485 -0.0537 0.035 Uiso 1 1 calc R . . 
H6B H 0.1746 0.3154 -0.0306 0.035 Uiso 1 1 calc R . . 
C7 C 0.16884(16) 0.35366(17) 0.1202(6) 0.0240(13) Uani 1 1 d . . . 
C8 C 0.05590(18) 0.37715(16) -0.4745(8) 0.0296(14) Uani 1 1 d . . . 
H8A H 0.0557 0.3941 -0.3981 0.036 Uiso 1 1 calc R . . 
H8B H 0.0356 0.3832 -0.5354 0.036 Uiso 1 1 calc R . . 
C9 C 0.09211(19) 0.38094(18) -0.5539(7) 0.0277(14) Uani 1 1 d . . . 
C10 C 0.02052(17) 0.31910(17) -0.4735(7) 0.0273(13) Uani 1 1 d . . . 
H10A H 0.0243 0.2943 -0.4447 0.033 Uiso 1 1 calc R . . 
H10B H 0.0211 0.3197 -0.5738 0.033 Uiso 1 1 calc R . . 
C11 C -0.01691(17) 0.33126(15) -0.4255(7) 0.0240(12) Uani 1 1 d . . . 
C12 C 0.12542(18) 0.22904(17) -0.1023(7) 0.0284(14) Uani 1 1 d . . . 
H12A H 0.1451 0.2318 -0.1695 0.034 Uiso 1 1 calc R . . 
H12B H 0.1213 0.2035 -0.0886 0.034 Uiso 1 1 calc R . . 
C13 C 0.13701(18) 0.24618(16) 0.0343(7) 0.0257(13) Uani 1 1 d . . . 
C14 C 0.06790(16) 0.22343(15) -0.2418(6) 0.0230(13) Uani 1 1 d . . . 
H14A H 0.0690 0.1987 -0.2092 0.028 Uiso 1 1 calc R . . 
H14B H 0.0769 0.2239 -0.3362 0.028 Uiso 1 1 calc R . . 
C15 C 0.02840(17) 0.23598(15) -0.2398(6) 0.0224(12) Uani 1 1 d . . . 
C16 C 0.1925(2) 0.2780(2) 0.5847(8) 0.0415(18) Uani 1 1 d . . . 
H16A H 0.1700 0.2668 0.6010 0.050 Uiso 1 1 calc R . . 
C17 C 0.2148(2) 0.2869(2) 0.6969(8) 0.0399(17) Uani 1 1 d . . . 
H17A H 0.2067 0.2824 0.7866 0.048 Uiso 1 1 calc R . . 
C18 C 0.2488(2) 0.30231(19) 0.6745(8) 0.0365(17) Uani 1 1 d . . . 
C19 C 0.2593(2) 0.3083(2) 0.5380(8) 0.046(2) Uani 1 1 d . . . 
H19A H 0.2823 0.3180 0.5182 0.055 Uiso 1 1 calc R . . 
C20 C 0.2354(2) 0.2997(2) 0.4325(9) 0.0427(18) Uani 1 1 d . . . 
H20A H 0.2426 0.3044 0.3419 0.051 Uiso 1 1 calc R . . 
C21 C 0.3210(2) 0.41090(18) 0.8601(7) 0.0321(15) Uani 1 1 d . . . 
H21A H 0.3412 0.4204 0.9067 0.038 Uiso 1 1 calc R . . 
C22 C 0.3162(2) 0.37387(18) 0.8608(7) 0.0356(16) Uani 1 1 d . . . 
H22A H 0.3331 0.3590 0.9053 0.043 Uiso 1 1 calc R . . 
C23 C 0.2861(2) 0.35956(18) 0.7946(7) 0.0334(15) Uani 1 1 d . . . 
C24 C 0.2627(2) 0.38276(18) 0.7242(8) 0.0367(17) Uani 1 1 d . . . 
H24A H 0.2426 0.3738 0.6753 0.044 Uiso 1 1 calc R . . 
C25 C 0.26964(19) 0.41891(18) 0.7281(8) 0.0353(16) Uani 1 1 d . . . 
H25A H 0.2537 0.4342 0.6808 0.042 Uiso 1 1 calc R . . 
N1 N 0.09922(16) 0.35088(14) -0.2695(6) 0.0271(11) Uani 1 1 d . . . 
N2 N 0.12353(15) 0.29980(13) -0.1483(5) 0.0263(12) Uani 1 1 d . . . 
N3 N 0.06962(15) 0.29334(13) -0.2873(5) 0.0248(11) Uani 1 1 d . . . 
N4 N 0.14993(17) 0.35611(14) -0.1278(6) 0.0296(12) Uani 1 1 d . . . 
N5 N 0.05041(14) 0.34092(13) -0.4206(6) 0.0270(11) Uani 1 1 d . . . 
N6 N 0.09170(14) 0.24576(13) -0.1557(5) 0.0223(11) Uani 1 1 d . . . 
N7 N 0.20252(17) 0.28496(16) 0.4543(7) 0.0357(14) Uani 1 1 d . . . 
N8 N 0.29818(15) 0.43376(14) 0.7962(6) 0.0280(12) Uani 1 1 d . . . 
O1 O 0.15991(18) 0.43133(19) -0.3604(8) 0.073(2) Uani 1 1 d . . . 
O1W O 0.05570(13) 0.24344(12) 0.3181(5) 0.0306(10) Uani 1 1 d . . . 
O2 O 0.17419(15) 0.37385(17) -0.3917(5) 0.0451(14) Uani 1 1 d . . . 
O2W O 0.15876(16) 0.21301(13) 0.3581(6) 0.0440(14) Uani 1 1 d . . . 
O3 O 0.17415(15) 0.33175(13) 0.2183(5) 0.0367(12) Uani 1 1 d . . . 
O3W O 0.11439(15) 0.28323(13) 0.4232(5) 0.0394(12) Uani 1 1 d . . . 
O4 O 0.15990(14) 0.38563(12) 0.1433(5) 0.0326(11) Uani 1 1 d . . . 
O4W O 0.2500 0.2500 0.1321(14) 0.133(6) Uani 1 2 d S . . 
O5 O 0.10263(16) 0.41213(13) -0.5839(6) 0.0429(13) Uani 1 1 d . . . 
O6 O 0.11095(13) 0.35409(12) -0.5869(5) 0.0324(11) Uani 1 1 d . . . 
O7 O -0.04434(12) 0.30966(11) -0.4284(6) 0.0295(10) Uani 1 1 d . . . 
O8 O -0.02095(13) 0.36346(12) -0.3909(6) 0.0352(12) Uani 1 1 d . . . 
O9 O 0.17058(12) 0.24897(13) 0.0625(5) 0.0317(10) Uani 1 1 d . . . 
O10 O 0.11198(13) 0.25604(13) 0.1179(5) 0.0296(10) Uani 1 1 d . . . 
O11 O 0.01042(13) 0.23148(13) -0.3488(5) 0.0337(11) Uani 1 1 d . . . 
O12 O 0.01505(13) 0.24837(11) -0.1279(5) 0.0263(9) Uani 1 1 d . . . 
 
loop_ 
 _atom_site_aniso_label 
 _atom_site_aniso_U_11 
 _atom_site_aniso_U_22 
 _atom_site_aniso_U_33 
 _atom_site_aniso_U_23 
 _atom_site_aniso_U_13 
 _atom_site_aniso_U_12 
S1 0.0625(14) 0.0312(9) 0.0551(12) 0.0058(9) -0.0299(11) -0.0051(9) 
Cd1 0.0236(2) 0.0252(2) 0.0223(2) 0.00047(19) -0.00074(18) -0.00059(17) 
Cd2 0.0232(2) 0.0339(2) 0.0211(2) -0.00009(19) 0.00185(18) -0.00434(19) 
Cd3 0.0416(3) 0.0275(2) 0.0274(2) -0.0004(2) -0.0065(2) -0.0037(2) 
C1 0.040(4) 0.024(3) 0.017(3) 0.002(3) 0.002(3) -0.008(3) 
C2 0.022(3) 0.020(3) 0.021(3) 0.004(2) 0.003(2) 0.004(2) 
C3 0.027(3) 0.026(3) 0.014(3) 0.005(2) 0.002(2) -0.004(2) 
C4 0.058(5) 0.025(3) 0.023(3) 0.004(3) -0.002(3) -0.015(3) 
C5 0.029(4) 0.061(5) 0.026(3) 0.013(4) -0.002(3) -0.015(4) 
C6 0.032(4) 0.033(3) 0.022(3) 0.001(3) -0.005(3) -0.004(3) 
C7 0.019(3) 0.033(3) 0.019(3) 0.002(3) 0.003(2) -0.004(2) 
C8 0.031(3) 0.022(3) 0.036(4) 0.008(3) -0.003(3) 0.001(3) 
C9 0.031(3) 0.033(3) 0.020(3) -0.001(3) 0.004(3) -0.005(3) 
C10 0.027(3) 0.026(3) 0.028(3) -0.002(3) 0.002(3) 0.001(3) 
C11 0.024(3) 0.025(3) 0.024(3) -0.002(3) -0.001(3) 0.001(2) 
C12 0.028(3) 0.027(3) 0.030(3) -0.001(3) -0.008(3) -0.002(3) 
C13 0.029(3) 0.021(3) 0.027(3) 0.003(3) -0.001(3) -0.003(2) 
C14 0.022(3) 0.022(3) 0.025(3) -0.002(2) -0.006(2) 0.000(2) 
C15 0.025(3) 0.018(3) 0.023(3) 0.004(2) 0.002(2) -0.003(2) 
C16 0.040(4) 0.052(4) 0.032(4) 0.000(4) -0.007(3) -0.013(3) 
C17 0.044(4) 0.044(4) 0.031(4) 0.001(3) -0.003(3) 0.002(4) 
C18 0.037(4) 0.032(4) 0.041(4) -0.007(3) -0.013(3) 0.002(3) 
C19 0.042(5) 0.052(5) 0.045(5) 0.001(4) -0.010(4) -0.020(4) 
C20 0.037(4) 0.051(4) 0.040(4) 0.012(4) -0.003(3) -0.005(4) 
C21 0.033(4) 0.035(3) 0.028(4) 0.000(3) -0.008(3) 0.002(3) 
C22 0.044(4) 0.029(3) 0.033(4) 0.001(3) -0.010(3) 0.003(3) 
C23 0.039(4) 0.031(3) 0.030(4) 0.000(3) -0.010(3) -0.004(3) 
C24 0.035(4) 0.028(3) 0.047(4) -0.004(3) -0.017(3) 0.002(3) 
C25 0.027(4) 0.033(4) 0.046(4) 0.002(3) -0.013(3) 0.003(3) 
N1 0.033(3) 0.022(2) 0.026(3) 0.001(2) -0.001(2) -0.002(2) 
N2 0.029(3) 0.022(2) 0.028(3) 0.001(2) -0.002(2) -0.006(2) 
N3 0.028(3) 0.021(2) 0.025(3) 0.000(2) 0.000(2) -0.005(2) 
N4 0.042(3) 0.025(3) 0.022(3) 0.002(2) -0.001(2) -0.010(2) 
N5 0.019(2) 0.026(2) 0.036(3) 0.010(3) -0.001(2) -0.001(2) 
N6 0.022(3) 0.022(2) 0.023(3) 0.002(2) -0.005(2) -0.002(2) 
N7 0.038(3) 0.034(3) 0.035(3) 0.007(3) -0.010(3) 0.002(3) 
N8 0.028(3) 0.023(2) 0.032(3) 0.001(2) -0.004(2) -0.002(2) 
O1 0.053(4) 0.073(4) 0.092(5) 0.058(4) -0.006(4) -0.007(3) 
O1W 0.031(3) 0.035(2) 0.026(2) 0.002(2) 0.003(2) -0.003(2) 
O2 0.039(3) 0.078(4) 0.018(3) 0.009(3) -0.001(2) -0.011(3) 
O2W 0.061(4) 0.025(2) 0.046(3) 0.003(2) -0.016(3) -0.003(2) 
O3 0.052(3) 0.032(2) 0.027(2) 0.007(2) -0.001(2) 0.001(2) 
O3W 0.045(3) 0.035(3) 0.038(3) -0.005(2) 0.005(2) -0.004(2) 
O4 0.048(3) 0.028(2) 0.022(2) 0.0014(19) 0.000(2) 0.004(2) 
O4W 0.077(9) 0.254(19) 0.066(8) 0.000 0.000 -0.005(10) 
O5 0.053(3) 0.028(2) 0.048(3) -0.001(2) 0.014(3) -0.008(2) 
O6 0.030(3) 0.036(3) 0.032(3) -0.004(2) 0.010(2) -0.002(2) 
O7 0.020(2) 0.028(2) 0.041(3) 0.001(2) 0.001(2) -0.0001(17) 
O8 0.027(2) 0.024(2) 0.055(3) -0.004(2) 0.007(2) 0.0015(19) 
O9 0.024(2) 0.043(3) 0.027(2) -0.003(2) -0.006(2) 0.001(2) 
O10 0.022(2) 0.043(3) 0.024(2) 0.001(2) -0.0028(18) -0.002(2) 
O11 0.026(2) 0.043(3) 0.032(3) -0.007(2) -0.006(2) 0.006(2) 
O12 0.028(2) 0.028(2) 0.023(2) -0.0005(18) -0.0033(19) -0.0003(18) 
 
_geom_special_details 
; 
 All esds (except the esd in the dihedral angle between two l.s. planes) 
 are estimated using the full covariance matrix.  The cell esds are taken 
 into account individually in the estimation of esds in distances, angles 
 and torsion angles; correlations between esds in cell parameters are only 
 used when they are defined by crystal symmetry.  An approximate (isotropic) 
 treatment of cell esds is used for estimating esds involving l.s. planes. 
; 
 
loop_ 
 _geom_bond_atom_site_label_1 
 _geom_bond_atom_site_label_2 
 _geom_bond_distance 
 _geom_bond_site_symmetry_2 
 _geom_bond_publ_flag 
S1 C18 1.766(7) . ? 
S1 C23 1.779(7) . ? 
Cd1 O12 2.316(5) . ? 
Cd1 O11 2.332(5) 6 ? 
Cd1 N8 2.353(5) 15_454 ? 
Cd1 O10 2.340(5) . ? 
Cd1 O7 2.344(4) 6 ? 
Cd1 O1W 2.390(5) . ? 
Cd2 O2 2.258(5) 1_556 ? 
Cd2 O8 2.297(5) 7 ? 
Cd2 O4 2.324(5) . ? 
Cd2 O6 2.368(5) 1_556 ? 
Cd2 O7 2.508(4) 7 ? 
Cd2 O5 2.501(6) 1_556 ? 
Cd2 O3 2.619(5) . ? 
Cd2 C11 2.755(6) 7 ? 
Cd3 O3W 2.269(5) . ? 
Cd3 N7 2.275(6) . ? 
Cd3 O9 2.290(5) . ? 
Cd3 O3 2.312(5) . ? 
Cd3 O2W 2.345(5) . ? 
Cd3 O10 2.485(5) . ? 
Cd3 C13 2.725(6) . ? 
C1 N1 1.337(8) . ? 
C1 N4 1.357(8) . ? 
C1 N2 1.355(8) . ? 
C2 N3 1.334(7) . ? 
C2 N1 1.355(8) . ? 
C2 N5 1.366(8) . ? 
C3 N3 1.318(8) . ? 
C3 N2 1.334(8) . ? 
C3 N6 1.409(7) . ? 
C4 N4 1.446(8) . ? 
C4 C5 1.525(10) . ? 
C5 O1 1.242(10) . ? 
C5 O2 1.250(10) . ? 
C6 N4 1.456(9) . ? 
C6 C7 1.516(9) . ? 
C7 O4 1.251(8) . ? 
C7 O3 1.264(8) . ? 
C8 N5 1.456(8) . ? 
C8 C9 1.528(9) . ? 
C9 O5 1.254(8) . ? 
C9 O6 1.250(8) . ? 
C10 N5 1.447(8) . ? 
C10 C11 1.505(8) . ? 
C11 O8 1.250(7) . ? 
C11 O7 1.279(7) . ? 
C11 Cd2 2.755(6) 15_454 ? 
C12 N6 1.466(8) . ? 
C12 C13 1.525(9) . ? 
C13 O9 1.253(8) . ? 
C13 O10 1.270(8) . ? 
C14 N6 1.458(7) . ? 
C14 C15 1.507(9) . ? 
C15 O11 1.250(8) . ? 
C15 O12 1.272(7) . ? 
C16 N7 1.337(10) . ? 
C16 C17 1.391(11) . ? 
C17 C18 1.378(11) . ? 
C18 C19 1.391(11) . ? 
C19 C20 1.374(11) . ? 
C20 N7 1.331(10) . ? 
C21 N8 1.338(8) . ? 
C21 C22 1.386(9) . ? 
C22 C23 1.374(10) . ? 
C23 C24 1.388(9) . ? 
C24 C25 1.367(9) . ? 
C25 N8 1.345(8) . ? 
N8 Cd1 2.353(5) 7 ? 
O2 Cd2 2.258(5) 1_554 ? 
O5 Cd2 2.501(6) 1_554 ? 
O6 Cd2 2.368(5) 1_554 ? 
O7 Cd1 2.344(4) 6_554 ? 
O7 Cd2 2.508(4) 15_454 ? 
O8 Cd2 2.297(5) 15_454 ? 
O11 Cd1 2.332(5) 6_554 ? 
 
loop_ 
 _geom_angle_atom_site_label_1 
 _geom_angle_atom_site_label_2 
 _geom_angle_atom_site_label_3 
 _geom_angle 
 _geom_angle_site_symmetry_1 
 _geom_angle_site_symmetry_3 
 _geom_angle_publ_flag 
C18 S1 C23 103.0(3) . . ? 
O12 Cd1 O11 78.73(17) . 6 ? 
O12 Cd1 N8 88.54(17) . 15_454 ? 
O11 Cd1 N8 77.98(18) 6 15_454 ? 
O12 Cd1 O10 132.00(16) . . ? 
O11 Cd1 O10 146.74(17) 6 . ? 
N8 Cd1 O10 89.06(18) 15_454 . ? 
O12 Cd1 O7 82.77(17) . 6 ? 
O11 Cd1 O7 100.75(17) 6 6 ? 
N8 Cd1 O7 171.29(19) 15_454 6 ? 
O10 Cd1 O7 96.32(16) . 6 ? 
O12 Cd1 O1W 151.30(16) . . ? 
O11 Cd1 O1W 80.05(17) 6 . ? 
N8 Cd1 O1W 105.67(17) 15_454 . ? 
O10 Cd1 O1W 74.14(16) . . ? 
O7 Cd1 O1W 82.45(17) 6 . ? 
O2 Cd2 O8 87.85(19) 1_556 7 ? 
O2 Cd2 O4 165.5(2) 1_556 . ? 
O8 Cd2 O4 89.86(19) 7 . ? 
O2 Cd2 O6 82.78(18) 1_556 1_556 ? 
O8 Cd2 O6 147.79(16) 7 1_556 ? 
O4 Cd2 O6 91.66(18) . 1_556 ? 
O2 Cd2 O7 109.02(19) 1_556 7 ? 
O8 Cd2 O7 54.31(15) 7 7 ? 
O4 Cd2 O7 80.94(17) . 7 ? 
O6 Cd2 O7 157.24(16) 1_556 7 ? 
O2 Cd2 O5 94.39(19) 1_556 1_556 ? 
O8 Cd2 O5 158.96(15) 7 1_556 ? 
O4 Cd2 O5 92.88(18) . 1_556 ? 
O6 Cd2 O5 53.02(16) 1_556 1_556 ? 
O7 Cd2 O5 105.57(15) 7 1_556 ? 
O2 Cd2 O3 113.4(2) 1_556 . ? 
O8 Cd2 O3 79.58(17) 7 . ? 
O4 Cd2 O3 52.17(15) . . ? 
O6 Cd2 O3 76.11(16) 1_556 . ? 
O7 Cd2 O3 114.33(16) 7 . ? 
O5 Cd2 O3 118.15(17) 1_556 . ? 
O2 Cd2 C11 100.08(19) 1_556 7 ? 
O8 Cd2 C11 26.73(16) 7 7 ? 
O4 Cd2 C11 83.91(19) . 7 ? 
O6 Cd2 C11 172.50(17) 1_556 7 ? 
O7 Cd2 C11 27.61(15) 7 7 ? 
O5 Cd2 C11 133.06(16) 1_556 7 ? 
O3 Cd2 C11 96.40(17) . 7 ? 
O3W Cd3 N7 90.0(2) . . ? 
O3W Cd3 O9 136.53(17) . . ? 
N7 Cd3 O9 132.6(2) . . ? 
O3W Cd3 O3 97.56(18) . . ? 
N7 Cd3 O3 83.2(2) . . ? 
O9 Cd3 O3 96.19(17) . . ? 
O3W Cd3 O2W 85.4(2) . . ? 
N7 Cd3 O2W 89.2(2) . . ? 
O9 Cd3 O2W 86.72(19) . . ? 
O3 Cd3 O2W 171.86(19) . . ? 
O3W Cd3 O10 81.89(17) . . ? 
N7 Cd3 O10 170.8(2) . . ? 
O9 Cd3 O10 54.91(15) . . ? 
O3 Cd3 O10 102.10(17) . . ? 
O2W Cd3 O10 85.81(17) . . ? 
O3W Cd3 C13 109.5(2) . . ? 
N7 Cd3 C13 159.3(2) . . ? 
O9 Cd3 C13 27.19(17) . . ? 
O3 Cd3 C13 100.51(17) . . ? 
O2W Cd3 C13 85.55(18) . . ? 
O10 Cd3 C13 27.72(17) . . ? 
N1 C1 N4 117.4(5) . . ? 
N1 C1 N2 125.9(6) . . ? 
N4 C1 N2 116.7(6) . . ? 
N3 C2 N1 126.1(6) . . ? 
N3 C2 N5 116.4(6) . . ? 
N1 C2 N5 117.5(5) . . ? 
N3 C3 N2 128.2(5) . . ? 
N3 C3 N6 116.6(5) . . ? 
N2 C3 N6 115.2(5) . . ? 
N4 C4 C5 115.3(6) . . ? 
O1 C5 O2 125.6(8) . . ? 
O1 C5 C4 115.1(8) . . ? 
O2 C5 C4 119.3(7) . . ? 
N4 C6 C7 114.1(6) . . ? 
O4 C7 O3 121.1(6) . . ? 
O4 C7 C6 119.6(6) . . ? 
O3 C7 C6 119.2(6) . . ? 
N5 C8 C9 112.5(5) . . ? 
O5 C9 O6 120.7(6) . . ? 
O5 C9 C8 117.6(6) . . ? 
O6 C9 C8 121.7(6) . . ? 
N5 C10 C11 113.5(5) . . ? 
O8 C11 O7 121.0(6) . . ? 
O8 C11 C10 118.4(5) . . ? 
O7 C11 C10 120.5(5) . . ? 
O8 C11 Cd2 55.7(3) . 15_454 ? 
O7 C11 Cd2 65.4(3) . 15_454 ? 
C10 C11 Cd2 170.6(4) . 15_454 ? 
N6 C12 C13 111.0(5) . . ? 
O9 C13 O10 122.2(6) . . ? 
O9 C13 C12 119.4(6) . . ? 
O10 C13 C12 118.3(6) . . ? 
O9 C13 Cd3 56.7(3) . . ? 
O10 C13 Cd3 65.6(3) . . ? 
C12 C13 Cd3 175.1(5) . . ? 
N6 C14 C15 112.4(5) . . ? 
O11 C15 O12 124.5(6) . . ? 
O11 C15 C14 116.4(5) . . ? 
O12 C15 C14 119.0(5) . . ? 
N7 C16 C17 122.1(7) . . ? 
C18 C17 C16 119.7(8) . . ? 
C17 C18 C19 117.4(7) . . ? 
C17 C18 S1 120.9(6) . . ? 
C19 C18 S1 121.6(6) . . ? 
C20 C19 C18 119.6(7) . . ? 
N7 C20 C19 122.8(8) . . ? 
N8 C21 C22 123.7(7) . . ? 
C23 C22 C21 118.8(7) . . ? 
C22 C23 C24 118.4(6) . . ? 
C22 C23 S1 117.1(5) . . ? 
C24 C23 S1 124.4(5) . . ? 
C25 C24 C23 118.9(7) . . ? 
N8 C25 C24 123.9(6) . . ? 
C1 N1 C2 113.5(5) . . ? 
C3 N2 C1 112.5(5) . . ? 
C3 N3 C2 113.2(5) . . ? 
C1 N4 C6 120.8(5) . . ? 
C1 N4 C4 120.2(6) . . ? 
C6 N4 C4 119.0(6) . . ? 
C2 N5 C8 119.5(5) . . ? 
C2 N5 C10 120.9(5) . . ? 
C8 N5 C10 119.6(5) . . ? 
C3 N6 C12 116.3(5) . . ? 
C3 N6 C14 114.6(5) . . ? 
C12 N6 C14 117.0(5) . . ? 
C20 N7 C16 118.2(7) . . ? 
C20 N7 Cd3 122.5(5) . . ? 
C16 N7 Cd3 119.3(5) . . ? 
C21 N8 C25 116.3(6) . . ? 
C21 N8 Cd1 124.9(4) . 7 ? 
C25 N8 Cd1 118.0(4) . 7 ? 
C5 O2 Cd2 108.9(5) . 1_554 ? 
C7 O3 Cd3 140.8(4) . . ? 
C7 O3 Cd2 86.0(4) . . ? 
Cd3 O3 Cd2 125.0(2) . . ? 
C7 O4 Cd2 100.3(4) . . ? 
C9 O5 Cd2 88.3(4) . 1_554 ? 
C9 O6 Cd2 94.5(4) . 1_554 ? 
C11 O7 Cd1 132.6(4) . 6_554 ? 
C11 O7 Cd2 87.0(3) . 15_454 ? 
Cd1 O7 Cd2 138.0(2) 6_554 15_454 ? 
C11 O8 Cd2 97.5(4) . 15_454 ? 
C13 O9 Cd3 96.1(4) . . ? 
C13 O10 Cd1 125.3(4) . . ? 
C13 O10 Cd3 86.7(4) . . ? 
Cd1 O10 Cd3 147.9(2) . . ? 
C15 O11 Cd1 135.4(4) . 6_554 ? 
C15 O12 Cd1 123.4(4) . . ? 
 
_diffrn_measured_fraction_theta_max    0.999 
_diffrn_reflns_theta_full              27.47 
_diffrn_measured_fraction_theta_full   0.999 
_refine_diff_density_max    0.526 
_refine_diff_density_min   -0.968 
_refine_diff_density_rms    0.121 
